# Supplementary material for: Long-Term Medical and Social Consequences of Preterm Birth
Source: Atypon-hosted journal article supplement (doi:10.1056/nejmoa0706475), 2008-07-16
Supplement: nejm_moster_262sa1.pdf [file nejm_moster_262sa1.pdf]

## Supplementary Appendix

This appendix has been provided by the authors to give readers additional information about their work.

Supplement to: Moster D, Lie RT, Markestad T. Long-term medical and social consequences of preterm birth. N Engl J Med 2008;359:262-73.

Web Table 1. ICD-9 and ICD-10 diagnoses registered in The National Insurance Scheme used to categorize neurological and mental disorders.

|                                                                    | ICD 9                                                                              | ICD 10             |
|--------------------------------------------------------------------|------------------------------------------------------------------------------------|--------------------|
| Cerebral Palsy                                                     | 342-344                                                                            | G80-G83            |
| Mental retardation                                                 | 317-319                                                                            | F70-F79            |
| Schizophrenia                                                      | 295                                                                                | F20-F21            |
| Autism spectrum                                                    | 299                                                                                | F84                |
| Disorders of psychological<br>development, behavior<br>and emotion | 307.0<br>307.2-307.3<br>307.5-307.7<br>307.9<br>309.2<br>309.8<br>312-315<br>784.6 | F80-F83<br>F88-F98 |

V40.0-V40.1

Other major  
disabilities

|                       |     |         |
|-----------------------|-----|---------|
| Epilepsy              | 345 | G40-G41 |
| Blindness, low vision | 369 | H54     |
| Hearing loss          | 389 | H90-H91 |

---

Web Table 2. Medical disabilities in relation to gestational age at birth divided according to year of birth.\*

|                     | <u>1967-1972</u> |                 |         | <u>1973-1978</u> |                 |         | <u>1979-1983</u> |                 |         |
|---------------------|------------------|-----------------|---------|------------------|-----------------|---------|------------------|-----------------|---------|
|                     | Percent          | RR (95% CI)     | Trend   | Percent          | RR (95% CI)     | Trend   | Percent          | RR (95% CI)     | Trend   |
| Cerebral palsy†     |                  |                 | p<0.001 |                  |                 | p<0.001 |                  |                 | p<0.001 |
| 23 Wk to 27 wk 6 d  | 5.0%             | 36 (14-95)      |         | 5.3%             | 45 (20-98)      |         | 14.9%            | 135 (90-203)    |         |
| 28 Wk to 30 wk 6 d  | 6.0%             | 47 (33-66)      |         | 5.9%             | 42 (29-60)      |         | 6.0%             | 49 (33-73)      |         |
| 31 Wk to 33 wk 6 d  | 2.1%             | 16 (12-21)      |         | 1.6%             | 12 (8.4-17)     |         | 1.9%             | 14 (9.1-21)     |         |
| 34 Wk to 36 wk 6 d  | 0.4%             | 2.7 (2.0-3.7)   |         | 0.3%             | 2.4 (1.6-3.4)   |         | 0.4%             | 3.1 (2.1-4.5)   |         |
| ≥ 37 Wk             | 0.1%             | 1.0 (reference) |         | 0.1%             | 1.0 (reference) |         | 0.1%             | 1.0 (reference) |         |
| Mental retardation† |                  |                 | p<0.001 |                  |                 | p<0.001 |                  |                 | p<0.001 |
| 23 Wk to 27 wk 6 d  | 4.0%             | 4.7 (1.2-19)    |         | 4.4%             | 10 (4.4-24)     |         | 4.7%             | 15 (7.4-32)     |         |
| 28 Wk to 30 wk 6 d  | 1.6%             | 3.6 (1.9-6.6)   |         | 1.7%             | 4.0 (2.1-7.4)   |         | 2.0%             | 5.4 (2.8-10)    |         |

|                    |      |                 |      |                 |      |                 |
|--------------------|------|-----------------|------|-----------------|------|-----------------|
| 31 Wk to 33 wk 6 d | 1.3% | 2.8 (2.0-3.8)   | 0.7% | 1.6 (1.0-2.7)   | 0.7% | 1.5 (0.7-3.0)   |
| 34 Wk to 36 wk 6 d | 0.7% | 1.5 (1.2-1.8)   | 0.7% | 1.6 (1.3-2.0)   | 0.6% | 1.7 (1.2-2.3)   |
| ≥ 37 Wk            | 0.5% | 1.0 (reference) | 0.4% | 1.0 (reference) | 0.3% | 1.0 (reference) |

Disorders of psychological

development, behavior

and emotion†

p<0.001

p=0.001

p<0.001

|                    |      |                 |      |                 |      |                 |
|--------------------|------|-----------------|------|-----------------|------|-----------------|
| 23 Wk to 27 wk 6 d | 1.0% | 10 (1.5-72)     | 2.7% | 13 (4.2-39)     | 3.4% | 9.7 (4.2-23)    |
| 28 Wk to 30 wk 6 d | 0.5% | 4.9 (1.6-15)    | 0.7% | 2.2 (0.7-6.9)   | 1.0% | 2.7 (1.1-6.6)   |
| 31 Wk to 33 wk 6 d | 0.2% | 2.1 (0.9-4.8)   | 0.3% | 1.0 (0.4-2.4)   | 0.6% | 1.5 (0.8-2.9)   |
| 34 Wk to 36 wk 6 d | 0.2% | 1.7 (1.1-2.6)   | 0.4% | 1.6 (1.1-2.2)   | 0.6% | 1.4 (1.0-1.9)   |
| ≥ 37 Wk            | 0.1% | 1.0 (reference) | 0.2% | 1.0 (reference) | 0.4% | 1.0 (reference) |

Other major

disabilities†‡

p<0.001

p<0.001

p<0.001

|                    |      |                 |      |                 |      |                 |
|--------------------|------|-----------------|------|-----------------|------|-----------------|
| 23 Wk to 27 wk 6 d | 4.0% | 25 (9.6-65)     | 3.5% | 17 (6.6-45)     | 4.7% | 18 (8.7-37)     |
| 28 Wk to 30 wk 6 d | 2.6% | 13 (8.0-22)     | 2.3% | 9.7 (5.5-17)    | 1.6% | 5.1 (2.5-11)    |
| 31 Wk to 33 wk 6 d | 0.4% | 2.3 (1.3-4.1)   | 0.5% | 2.2 (1.2-4.1)   | 0.7% | 2.5 (1.4-4.5)   |
| 34 Wk to 36 wk 6 d | 0.3% | 1.6 (1.1-2.2)   | 0.3% | 1.5 (1.0-2.1)   | 0.4% | 1.4 (1.0-2.0)   |
| ≥ 37 Wk            | 0.2% | 1.0 (reference) | 0.2% | 1.0 (reference) | 0.3% | 1.0 (reference) |

Any medical disability

severely affecting

working capacity§

p<0.001

p<0.001

p<0.001

|                    |       |                 |      |                 |       |                 |
|--------------------|-------|-----------------|------|-----------------|-------|-----------------|
| 23 Wk to 27 wk 6 d | 11.9% | 4.4 (2.5-7.9)   | 8.0% | 5.9 (3.2-11)    | 11.6% | 21 (14-33)      |
| 28 Wk to 30 wk 6 d | 10.4% | 3.8 (3.0-4.9)   | 8.9% | 5.8 (4.4-7.6)   | 4.9%  | 7.8 (5.2-12)    |
| 31 Wk to 33 wk 6 d | 6.1%  | 2.2 (1.9-2.6)   | 3.4% | 2.1 (1.6-2.7)   | 1.8%  | 2.6 (1.7-3.8)   |
| 34 Wk to 36 wk 6 d | 3.4%  | 1.3 (1.1-1.4)   | 2.2% | 1.5 (1.3-1.7)   | 1.1%  | 1.7 (1.3-2.1)   |
| ≥ 37 Wk            | 2.6%  | 1.0 (reference) | 1.4% | 1.0 (reference) | 0.6%  | 1.0 (reference) |

---

\* All analyses are adjusted for sex, year of birth, multiple births, single motherhood, maternal age, mother's level of education, father's level of education, and immigrant parents.

† This category of diagnosis is extracted from the primary medical diagnoses registered in the National Insurance Scheme as the reasons for giving disability benefits (Web Table 1).

‡ Other major disabilities include blindness, low vision, hearing loss and epilepsy.

§ The working capacity was assessed permanently reduced by at least 50 percent due to any medical condition by the National Insurance Scheme at age 18 years or older. Children who died before their 18<sup>th</sup> birthday were excluded.

Web Table 3. Medical disabilities according to gestational age stratified by sex.\*

|                     | <u>Males</u> |                 |         | <u>Females</u> |                 |         |
|---------------------|--------------|-----------------|---------|----------------|-----------------|---------|
|                     | Percent      | RR (95% CI)     | Trend   | Percent        | RR (95% CI)     | Trend   |
| Cerebral palsy†     |              |                 | p<0.001 |                |                 | p<0.001 |
| 23 Wk to 27 wk 6 d  | 10.5%        | 88 (58-134)     |         | 7.6%           | 66 (38-115)     |         |
| 28 Wk to 30 wk 6 d  | 5.7%         | 42 (32-57)      |         | 6.3%           | 50 (37-68)      |         |
| 31 Wk to 33 wk 6 d  | 1.9%         | 14 (10-18)      |         | 1.9%           | 15 (11-20)      |         |
| 34 Wk to 36 wk 6 d  | 0.4%         | 2.7 (2.1-3.5)   |         | 0.3%           | 2.7 (2.0-3.6)   |         |
| ≥ 37 Wk             | 0.1%         | 1.0 (reference) |         | 0.1%           | 1.0 (reference) |         |
| Mental retardation† |              |                 | p<0.001 |                |                 | p<0.001 |
| 23 Wk to 27 wk 6 d  | 5.8%         | 14 (7.9-25)     |         | 2.9%           | 5.2 (1.7-16)    |         |
| 28 Wk to 30 wk 6 d  | 1.7%         | 3.7 (2.2-6.2)   |         | 1.8%           | 4.8 (2.9-8.1)   |         |

|                    |      |                 |      |                 |
|--------------------|------|-----------------|------|-----------------|
| 31 Wk to 33 wk 6 d | 0.9% | 1.9 (1.3-2.7)   | 1.0% | 2.4 (1.7-3.6)   |
| 34 Wk to 36 wk 6 d | 0.8% | 1.7 (1.4-2.0)   | 0.6% | 1.4 (1.1-1.7)   |
| ≥ 37 Wk            | 0.4% | 1.0 (reference) | 0.4% | 1.0 (reference) |

Disorders of psychological  
development, behavior  
and emotion†

p<0.001

p=0.005

|                    |      |                 |      |                 |
|--------------------|------|-----------------|------|-----------------|
| 23 Wk to 27 wk 6 d | 3.7% | 11 (5.3-22)     | 1.2% | 9.3 (2.4-37)    |
| 28 Wk to 30 wk 6 d | 1.2% | 3.4 (1.8-6.4)   | 0.1% | 1.1 (0.2-7.7)   |
| 31 Wk to 33 wk 6 d | 0.5% | 1.4 (0.9-2.4)   | 0.2% | 1.5 (0.6-3.6)   |
| 34 Wk to 36 wk 6 d | 0.5% | 1.5 (1.2-1.9)   | 0.2% | 1.5 (1.0-2.3)   |
| ≥ 37 Wk            | 0.3% | 1.0 (reference) | 0.1% | 1.0 (reference) |

Other major  
disabilities†‡

p<0.001

p<0.001

|                    |      |                 |      |                 |
|--------------------|------|-----------------|------|-----------------|
| 23 Wk to 27 wk 6 d | 4.2% | 20 (10-39)      | 4.1% | 19 (9.2-40)     |
| 28 Wk to 30 wk 6 d | 2.3% | 9.6 (6.1-15)    | 2.1% | 8.9 (5.3-15)    |
| 31 Wk to 33 wk 6 d | 0.5% | 2.2 (1.4-3.6)   | 0.6% | 2.5 (1.5-4.1)   |
| 34 Wk to 36 wk 6 d | 0.3% | 1.4 (1.1-1.9)   | 0.4% | 1.6 (1.2-2.1)   |
| ≥ 37 Wk            | 0.2% | 1.0 (reference) | 0.2% | 1.0 (reference) |

Any medical disability

severely affecting

working capacity§

p<0.001

p<0.001

|                    |       |                 |      |                 |
|--------------------|-------|-----------------|------|-----------------|
| 23 Wk to 27 wk 6 d | 13.3% | 9.3 (6.6-13)    | 7.6% | 5.2 (3.0-9.0)   |
| 28 Wk to 30 wk 6 d | 8.2%  | 5.0 (4.0-6.3)   | 8.3% | 4.6 (3.6-5.9)   |
| 31 Wk to 33 wk 6 d | 3.9%  | 2.2 (1.8-2.6)   | 4.4% | 2.3 (1.9-2.7)   |
| 34 Wk to 36 wk 6 d | 2.4%  | 1.4 (1.3-1.6)   | 2.5% | 1.3 (1.2-1.5)   |
| ≥ 37 Wk            | 1.6%  | 1.0 (reference) | 1.7% | 1.0 (reference) |

---

\* All analyses are adjusted for year of birth, multiple births, single motherhood, maternal age, mother's level of education, father's level of education, and immigrant parents.

† This category of diagnosis is extracted from the primary medical diagnoses registered in the National Insurance Scheme as the reasons for giving disability benefits (Web Table 1).

‡ Other major disabilities include blindness, low vision, hearing loss and epilepsy.

§ The working capacity was assessed permanently reduced by at least 50 percent due to any medical condition by the National Insurance Scheme at age 18 years or older. Children who died before their 18<sup>th</sup> birthday were excluded.

Web Table 4. Education, employment, income, biologic parenthood, social relations and criminality in relation to gestational age at birth stratified by sex.\*

|                                              | <u>Males</u> |                 |        | <u>Females</u> |                 |        |
|----------------------------------------------|--------------|-----------------|--------|----------------|-----------------|--------|
|                                              | Percent      | RR (95% CI)     | Trend  | Percent        | RR (95% CI)     | Trend  |
| Completed high school†                       |              |                 | p=0.03 |                |                 | p=0.06 |
| 23 Wk to 27 wk 6 d                           | 62.6%        | 0.9 (0.7-1.1)   |        | 72.7%          | 1.0 (0.8-1.2)   |        |
| 28 Wk to 30 wk 6 d                           | 67.6%        | 1.0 (0.9-1.0)   |        | 72.4%          | 1.0 (0.9-1.1)   |        |
| 31 Wk to 33 wk 6 d                           | 70.0%        | 1.0 (0.9-1.0)   |        | 74.4%          | 1.0 (1.0-1.0)   |        |
| 34 Wk to 36 wk 6 d                           | 71.3%        | 1.0 (1.0-1.0)   |        | 73.5%          | 1.0 (1.0-1.0)   |        |
| ≥ 37 Wk                                      | 73.8%        | 1.0 (reference) |        | 77.1%          | 1.0 (reference) |        |
| Completed University,<br>bachelor's degree‡‡ |              |                 | p=0.08 |                |                 | p=0.04 |

|                    |       |                 |       |                 |
|--------------------|-------|-----------------|-------|-----------------|
| 23 Wk to 27 wk 6 d | 20.2% | 0.8 (0.5-1.3)   | 30.1% | 0.8 (0.6-1.2)   |
| 28 Wk to 30 wk 6 d | 22.7% | 0.9 (0.7-1.0)   | 33.8% | 0.9 (0.8-1.1)   |
| 31 Wk to 33 wk 6 d | 26.1% | 1.0 (0.9-1.1)   | 36.0% | 1.0 (0.9-1.0)   |
| 34 Wk to 36 wk 6 d | 26.8% | 1.0 (0.9-1.0)   | 37.2% | 1.0 (0.9-1.0)   |
| ≥ 37 Wk            | 28.9% | 1.0 (reference) | 40.6% | 1.0 (reference) |

Completed postgraduate

degree†§

p=0.04

p=0.06

|                    |      |                 |      |                 |
|--------------------|------|-----------------|------|-----------------|
| 23 Wk to 27 wk 6 d | 6.4% | 1.0 (0.4-2.6)   | 2.7% | 0.5 (0.1-1.9)   |
| 28 Wk to 30 wk 6 d | 5.9% | 0.9 (0.6-1.3)   | 3.7% | 0.8 (0.5-1.3)   |
| 31 Wk to 33 wk 6 d | 5.3% | 0.8 (0.7-1.0)   | 5.3% | 1.0 (0.8-1.2)   |
| 34 Wk to 36 wk 6 d | 6.9% | 1.0 (0.9-1.1)   | 5.1% | 0.9 (0.8-1.0)   |
| ≥ 37 Wk            | 7.6% | 1.0 (reference) | 6.4% | 1.0 (reference) |

Low job-related income¶

p<0.001

p<0.001

|                    |       |                 |       |                 |
|--------------------|-------|-----------------|-------|-----------------|
| 23 Wk to 27 wk 6 d | 15.7% | 1.0 (0.6-1.5)   | 29.9% | 1.3 (1.0-1.7)   |
| 28 Wk to 30 wk 6 d | 16.8% | 1.1 (0.9-1.3)   | 30.3% | 1.2 (1.1-1.3)   |
| 31 Wk to 33 wk 6 d | 15.9% | 1.1 (1.0-1.2)   | 26.5% | 1.0 (1.0-1.1)   |
| 34 Wk to 36 wk 6 d | 16.3% | 1.1 (1.0-1.1)   | 26.3% | 1.0 (1.0-1.1)   |
| ≥ 37 Wk            | 15.3% | 1.0 (reference) | 24.7% | 1.0 (reference) |

High job-related income||

p<0.001

p=0.002

|                    |       |                 |      |                 |
|--------------------|-------|-----------------|------|-----------------|
| 23 Wk to 27 wk 6 d | 25.6% | 0.9 (0.7-1.2)   | 6.3% | 0.6 (0.3-1.2)   |
| 28 Wk to 30 wk 6 d | 27.1% | 0.9 (0.8-1.0)   | 6.6% | 0.7 (0.5-1.0)   |
| 31 Wk to 33 wk 6 d | 28.5% | 1.0 (0.9-1.0)   | 8.2% | 0.9 (0.8-1.0)   |
| 34 Wk to 36 wk 6 d | 28.9% | 1.0 (0.9-1.0)   | 8.9% | 1.0 (0.9-1.0)   |
| ≥ 37 Wk            | 30.2% | 1.0 (reference) | 9.5% | 1.0 (reference) |

Unemployed\*\*

p=0.88

p=0.18

|                    |       |               |       |               |
|--------------------|-------|---------------|-------|---------------|
| 23 Wk to 27 wk 6 d | 19.5% | 0.8 (0.5-1.1) | 15.6% | 0.9 (0.6-1.3) |
|--------------------|-------|---------------|-------|---------------|

|                    |       |                 |       |                 |
|--------------------|-------|-----------------|-------|-----------------|
| 28 Wk to 30 wk 6 d | 29.5% | 1.1 (1.0-1.2)   | 19.3% | 0.9 (0.8-1.1)   |
| 31 Wk to 33 wk 6 d | 27.2% | 1.0 (0.9-1.0)   | 21.9% | 1.0 (0.9-1.1)   |
| 34 Wk to 36 wk 6 d | 27.4% | 1.0 (1.0-1.0)   | 20.9% | 1.0 (0.9-1.0)   |
| ≥ 37 Wk            | 26.8% | 1.0 (reference) | 20.4% | 1.0 (reference) |

Received social

security benefits

p<0.001

p<0.001

|                    |       |                 |       |                 |
|--------------------|-------|-----------------|-------|-----------------|
| 23 Wk to 27 wk 6 d | 19.5% | 1.2 (0.9-1.7)   | 20.3% | 1.1 (0.8-1.6)   |
| 28 Wk to 30 wk 6 d | 20.7% | 1.1 (1.0-1.2)   | 24.2% | 1.2 (1.0-1.3)   |
| 31 Wk to 33 wk 6 d | 20.0% | 1.1 (1.0-1.2)   | 21.5% | 1.0 (0.9-1.1)   |
| 34 Wk to 36 wk 6 d | 18.7% | 1.1 (1.0-1.1)   | 21.8% | 1.1 (1.0-1.1)   |
| ≥ 37 Wk            | 16.5% | 1.0 (reference) | 18.6% | 1.0 (reference) |

Biologic parenthood† ††

p<0.001

p<0.001

|                    |       |               |       |               |
|--------------------|-------|---------------|-------|---------------|
| 23 Wk to 27 wk 6 d | 19.5% | 0.7 (0.4-1.0) | 37.5% | 0.9 (0.6-1.2) |
|--------------------|-------|---------------|-------|---------------|

|                    |       |                 |       |                 |
|--------------------|-------|-----------------|-------|-----------------|
| 28 Wk to 30 wk 6 d | 28.5% | 0.9 (0.7-1.0)   | 45.4% | 0.9 (0.8-1.0)   |
| 31 Wk to 33 wk 6 d | 34.2% | 0.9 (0.9-1.0)   | 50.1% | 0.9 (0.9-1.0)   |
| 34 Wk to 36 wk 6 d | 35.1% | 1.0 (0.9-1.0 )  | 52.0% | 1.0 (0.9-1.0)   |
| ≥ 37 Wk            | 35.4% | 1.0 (reference) | 51.2% | 1.0 (reference) |

Married or cohabitating

p<0.001

p<0.001

|                    |       |                 |       |                 |
|--------------------|-------|-----------------|-------|-----------------|
| 23 Wk to 27 wk 6 d | 4.9%  | 0.4 (0.2-0.8)   | 14.8% | 0.9 (0.6-1.3)   |
| 28 Wk to 30 wk 6 d | 11.5% | 0.9 (0.7-1.1)   | 17.7% | 0.9 (0.7-1.0)   |
| 31 Wk to 33 wk 6 d | 12.5% | 0.9 (0.8-0.9)   | 20.9% | 0.9 (0.9-1.0)   |
| 34 Wk to 36 wk 6 d | 13.9% | 0.9 (0.9-1.0 )  | 21.5% | 1.0 (0.9-1.0)   |
| ≥ 37 Wk            | 14.6% | 1.0 (reference) | 22.1% | 1.0 (reference) |

Divorced

p=0.002

p=0.001

|                    |      |               |      |               |
|--------------------|------|---------------|------|---------------|
| 23 Wk to 27 wk 6 d | 0%   | ‡‡            | 1.6% | 0.8 (0.2-2.9) |
| 28 Wk to 30 wk 6 d | 0.7% | 0.5 (0.2-1.1) | 2.3% | 0.7 (0.4-1.2) |

|                    |      |                 |      |                 |
|--------------------|------|-----------------|------|-----------------|
| 31 Wk to 33 wk 6 d | 1.5% | 0.8 (0.6-1.1)   | 2.6% | 0.7 (0.5-0.9)   |
| 34 Wk to 36 wk 6 d | 1.6% | 0.9 (0.8-1.0)   | 3.3% | 0.9 (0.9-1.0)   |
| ≥ 37 Wk            | 1.7% | 1.0 (reference) | 3.3% | 1.0 (reference) |

Overall criminality p=0.42 p=0.69

|                    |       |                 |      |                 |
|--------------------|-------|-----------------|------|-----------------|
| 23 Wk to 27 wk 6 d | 15.4% | 1.0 (0.7-1.6)   | 3.9% | 1.4 (0.6-3.3)   |
| 28 Wk to 30 wk 6 d | 14.8% | 1.0 (0.8-1.1)   | 3.4% | 1.0 (0.6-1.6)   |
| 31 Wk to 33 wk 6 d | 16.0% | 1.0 (0.9-1.1)   | 2.8% | 0.9 (0.7-1.2)   |
| 34 Wk to 36 wk 6 d | 15.5% | 1.0 (1.0-1.1)   | 2.9% | 1.0 (0.9-1.1)   |
| ≥ 37 Wk            | 14.4% | 1.0 (reference) | 2.8% | 1.0 (reference) |

Received a sentence for violence

or criminal damage p=0.62 p=0.96

|                    |      |               |    |    |
|--------------------|------|---------------|----|----|
| 23 Wk to 27 wk 6 d | 4.1% | 0.8 (0.3-2.1) | 0% | ‡‡ |
| 28 Wk to 30 wk 6 d | 3.6% | 0.9 (0.6-1.2) | 0% | ‡‡ |

|                    |      |                 |      |                 |
|--------------------|------|-----------------|------|-----------------|
| 31 Wk to 33 wk 6 d | 4.6% | 1.0 (0.9-1.2)   | 0.5% | 1.5 (0.9-2.5)   |
| 34 Wk to 36 wk 6 d | 4.3% | 1.0 (0.9-1.1)   | 0.4% | 1.0 (0.7-1.3)   |
| ≥ 37 Wk            | 4.1% | 1.0 (reference) | 0.3% | 1.0 (reference) |

Received a sentence

for drug felony

p=0.57

p=0.74

|                    |      |                 |      |                 |
|--------------------|------|-----------------|------|-----------------|
| 23 Wk to 27 wk 6 d | 4.9% | 0.9 (0.4-2.2)   | 3.1% | 2.6 (1.0-6.7)   |
| 28 Wk to 30 wk 6 d | 4.8% | 1.1 (0.8-1.5)   | 1.4% | 1.2 (0.6-2.3)   |
| 31 Wk to 33 wk 6 d | 4.6% | 1.0 (0.9-1.2)   | 1.0% | 0.8 (0.5-1.2)   |
| 34 Wk to 36 wk 6 d | 4.5% | 1.0 (0.9-1.1)   | 1.3% | 1.0 (0.9-1.2)   |
| ≥ 37 Wk            | 4.3% | 1.0 (reference) | 1.2% | 1.0 (reference) |

---

\* People receiving disability benefits for medical reasons were excluded from these analyses. All analyses are adjusted for year of birth, multiple births, single motherhood, maternal age, mother's level of education, father's level of education, and immigrant status of parents.

†A Cox regression model was used for estimation since log-binomial regression did not converge.

‡ Persons born later than 1980 were excluded from this analysis.

§ Persons born later than 1978 were excluded from this analysis.

¶ Low job-related income was defined as a job-related yearly income that was lower than the 20<sup>th</sup> percentile for persons born during the same year.

|| High job-related income was defined as a job-related yearly income that was higher than the 80<sup>th</sup> percentile for persons born during the same year.

\*\* This category includes persons who had been registered at any time as unemployed by the Norwegian Employment Service.

†† This category includes persons who were registered as a biologic mother or father in The Medical Birth Registry of Norway.

‡‡ Relative risks could not be reliably calculated because the numbers in the cells were too small
